# Supplementary material for: Single-crystalline Ni(OH)2nanosheets vertically aligned on a three-dimensional nanoporous metal for high-performance asymmetric supercapacitors
Source: Royal Society of Chemistry journal article supplement (doi:10.1039/c5ta05335h), 2015-01-01
Supplement: c5ta05335h1.pdf [file c5ta05335h1.pdf]

## **Supporting information**

*for*

### **Single-crystalline Ni(OH)<sub>2</sub> nanosheets vertically aligned on three-dimensional nanoporous metal for high-performance asymmetric supercapacitors**

Chao Hou, Xing-You Lang\*, Zi Wen, Yong-Fu Zhu, Ming Zhao, Jian-Chen Li, Wei-Tao Zheng, Jian-She Lian, Qing Jiang\*

*Key Laboratory of Automobile Materials (Jilin University), Ministry of Education, and School of Materials Science and Engineering, Jilin University, Changchun 130022, China*

\* Correspondence and requests for materials should be addressed to X.Y.L. (email: xylang@jlu.edu.cn) or Q.J. (email: jiangq@jlu.edu.cn).

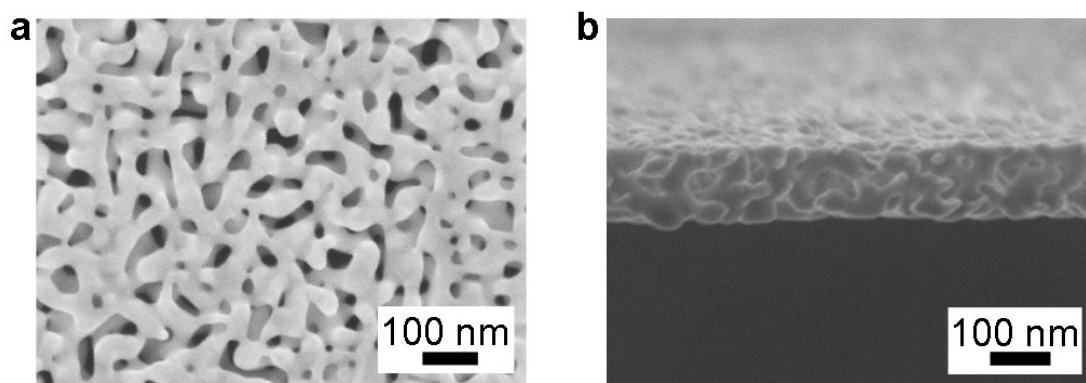

**Figure S1.** SEM images of **(a)** top view and **(b)** cross-sectional view of NP Au.

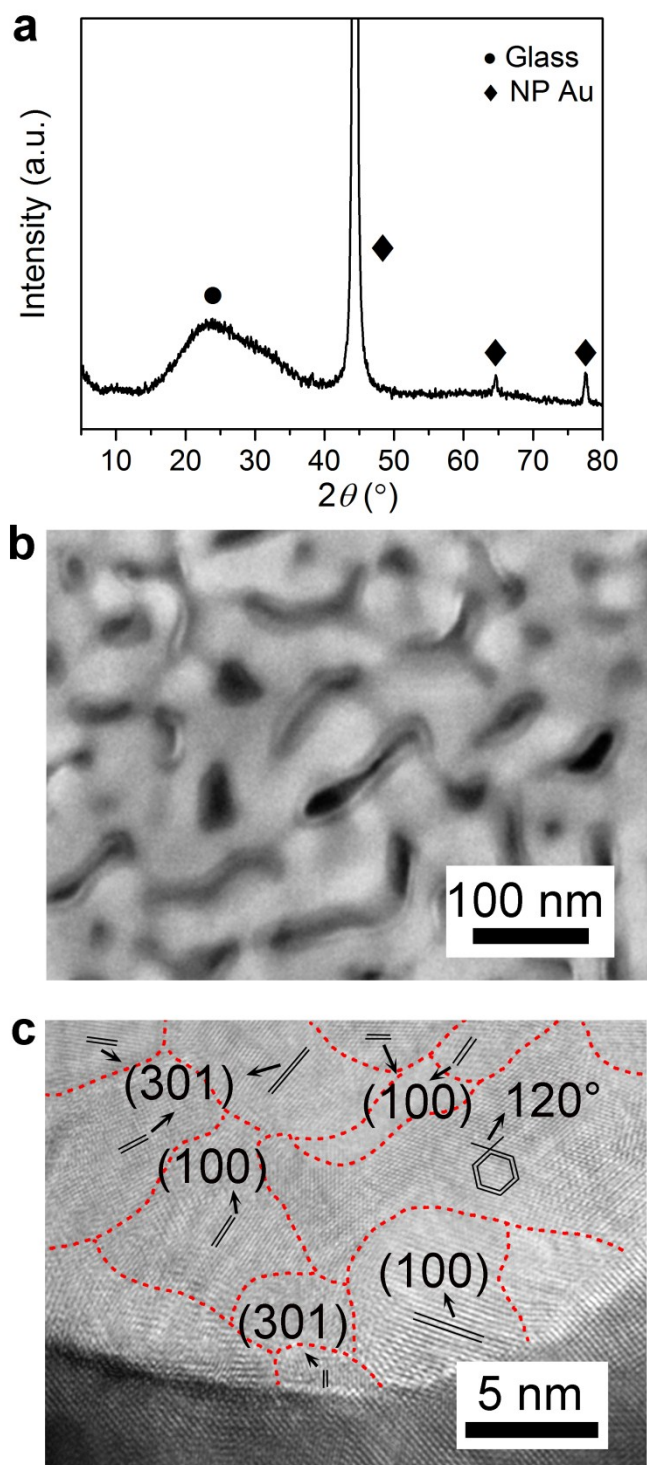

**Figure S2.** (a) XRD pattern (b) SEM and (c) HRTEM image of NP Au/RA Ni(OH)<sub>2</sub> electrode fabricated without the addition of K<sub>2</sub>S<sub>2</sub>O<sub>8</sub> in the aqueous solution.

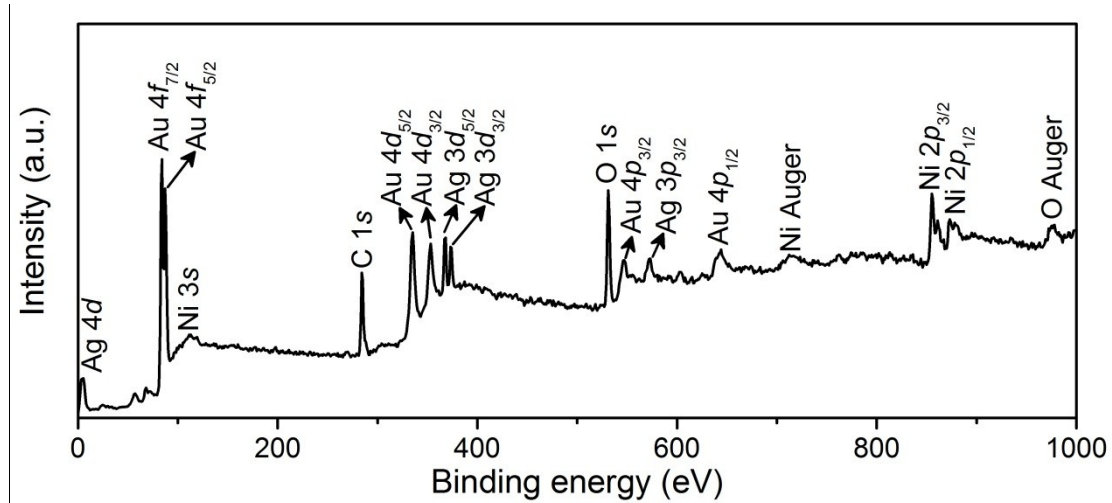

**Figure S3.** Typical XPS survey spectrum for the NP Au/VA Ni(OH)<sub>2</sub> electrode.

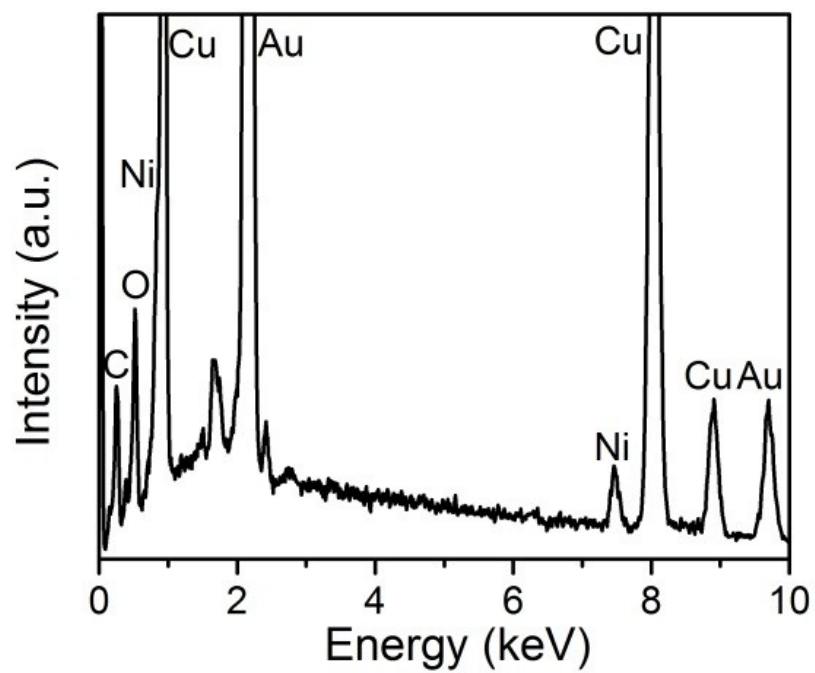

**Figure S4.** EDS spectrum of NP Au/VA Ni(OH)<sub>2</sub> electrode. The content Cu was from supported Cu foil.

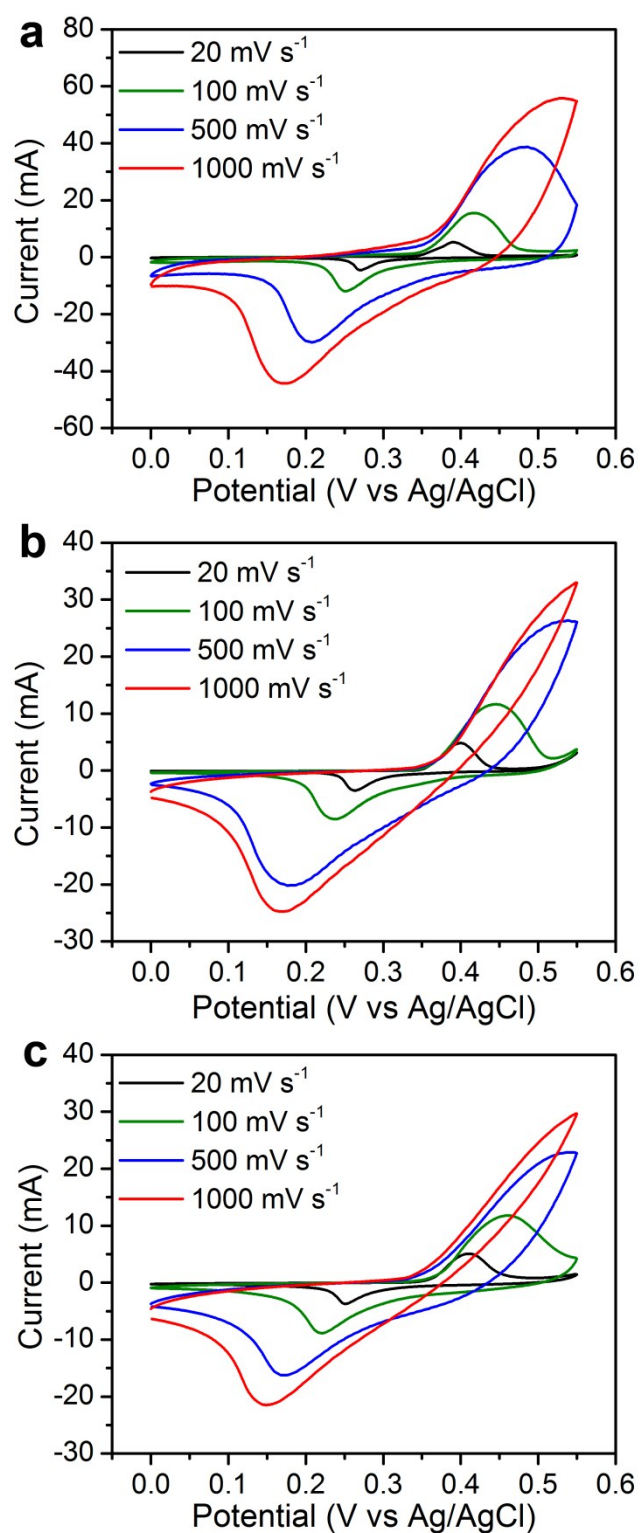

**Figure S5.** Typical CV curves of **(a)** NP Au/RA Ni(OH)<sub>2</sub>, **(b)** CFP/VA Ni(OH)<sub>2</sub> and **(c)** CFP/RA Ni(OH)<sub>2</sub> electrodes at various scan rates.

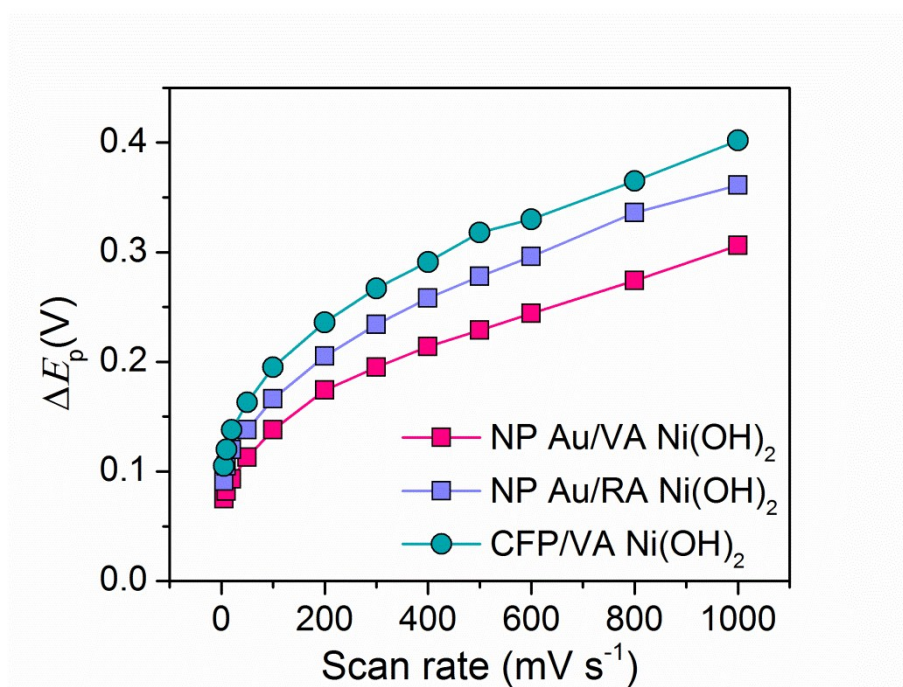

**Figure S6.** The potential difference between the anodic peaks and the cathode peaks ( $\Delta E_p = E_O - E_R$ ) for NP Au/VA Ni(OH)<sub>2</sub>, NP Au/RA Ni(OH)<sub>2</sub> and CFP/VA Ni(OH)<sub>2</sub> electrodes as a function of scan rate.

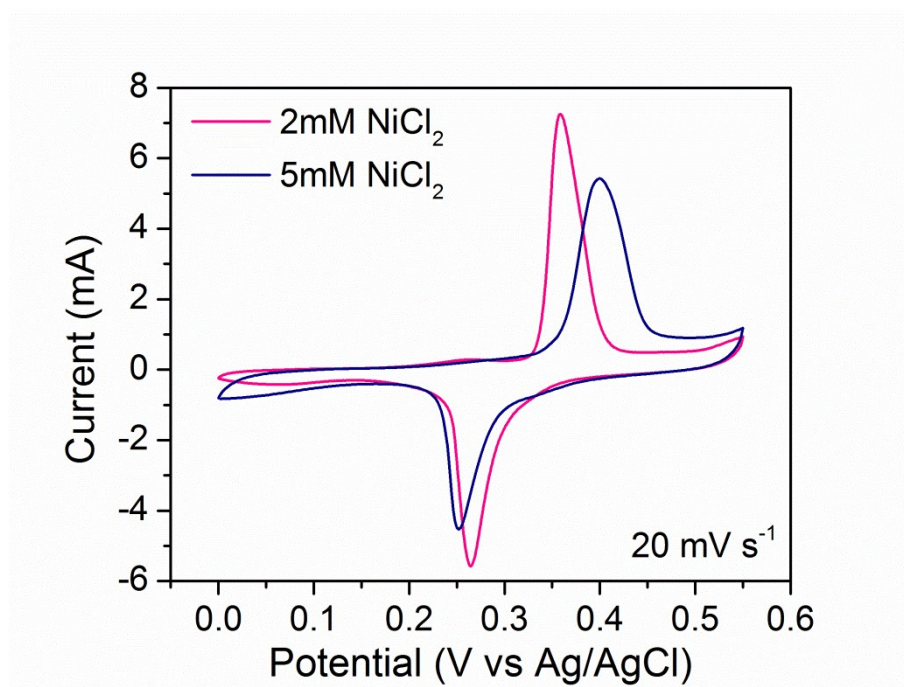

**Figure S7.** Comparison of CV curves for NP Au/VA Ni(OH)<sub>2</sub> with different loading of Ni(OH)<sub>2</sub>, which is controlled by using different concentration of precursor NiCl<sub>2</sub>. The scan rate is 20 mV s<sup>-1</sup>.

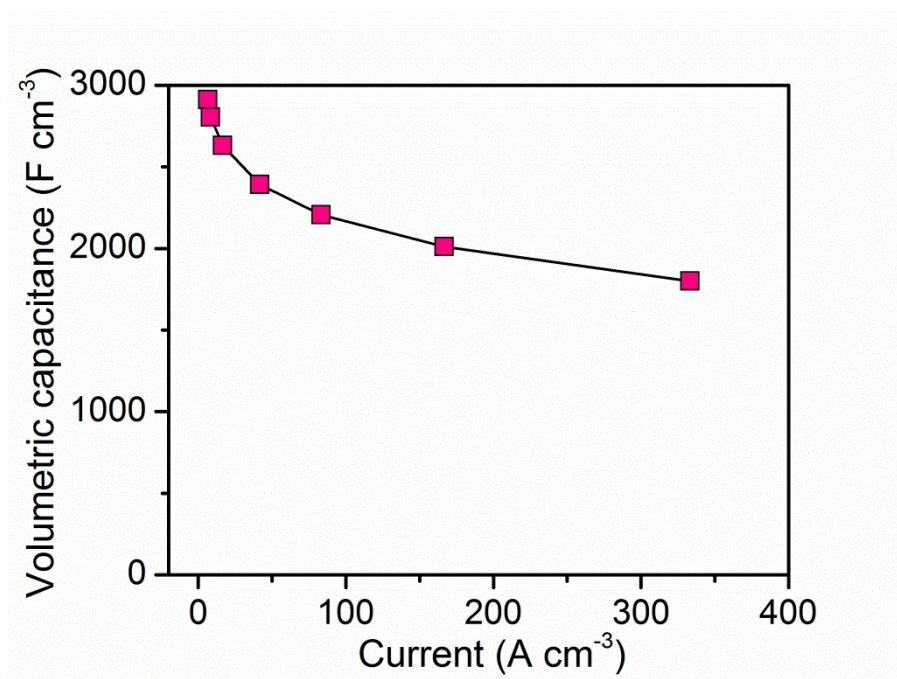

**Figure S8.** Volumetric capacitance of NP Au/VA Ni(OH)<sub>2</sub> electrode as a function of volumetric current density.

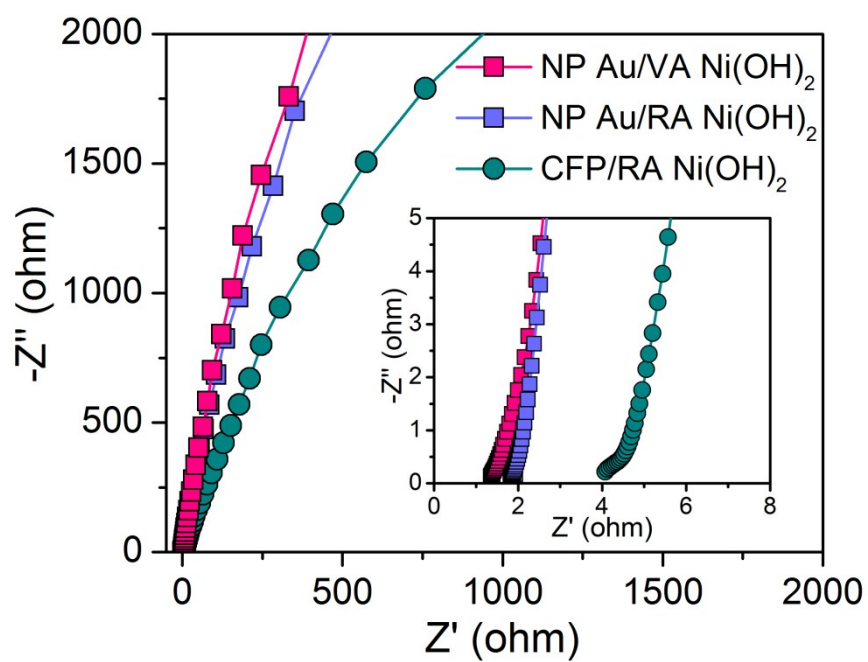

**Figure S9.** Complex plane plot of the impedances of NP Au/VA  $\text{Ni(OH)}_2$ , NP Au/RA  $\text{Ni(OH)}_2$  and CFP/VA  $\text{Ni(OH)}_2$  electrodes, with a magnification for the high frequency region in the inset.

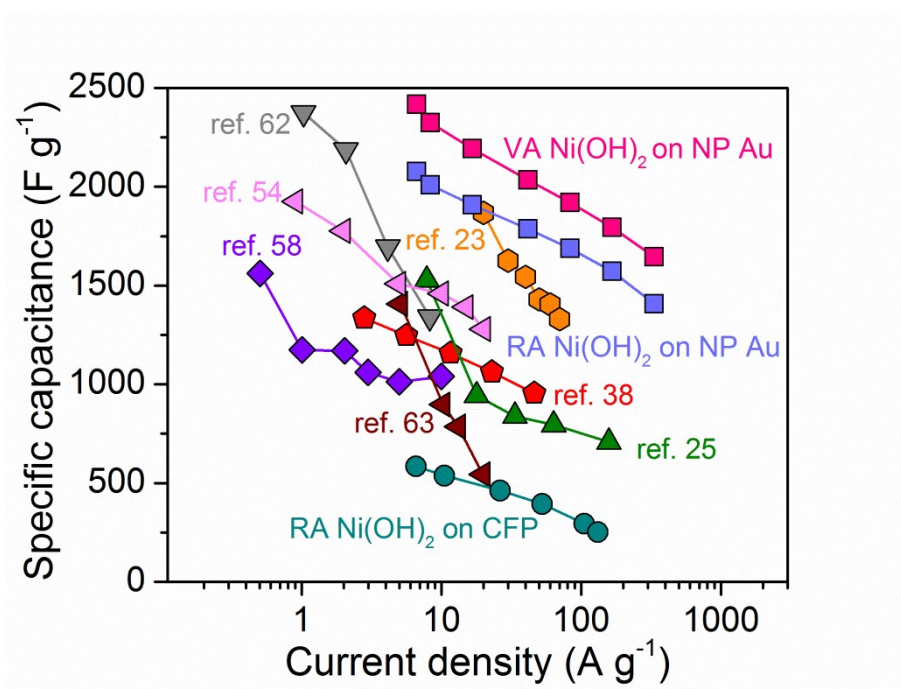

**Figure S10.** Specific capacitance of constituent VA Ni(OH)<sub>2</sub> on NP Au, in comparison with RA Ni(OH)<sub>2</sub> on NP Au, RA Ni(OH)<sub>2</sub> on CFP and other previously reported Ni(OH)<sub>2</sub>-based electrodes, such as graphite/amorphous Ni(OH)<sub>2</sub>,<sup>23</sup> Ni foil/3D Ni(OH)<sub>2</sub>,<sup>25</sup> graphene/Ni(OH)<sub>2</sub>,<sup>38</sup> Au nanoparticles-deposited Ni(OH)<sub>2</sub>,<sup>54</sup> 3D graphite foam/Ni(OH)<sub>2</sub>,<sup>58</sup> Ni foam/CoO/Ni(OH)<sub>2</sub>,<sup>62</sup> and 3D graphene/Ni<sub>3</sub>S<sub>2</sub>/Ni(OH)<sub>2</sub> electrodes.<sup>63</sup>

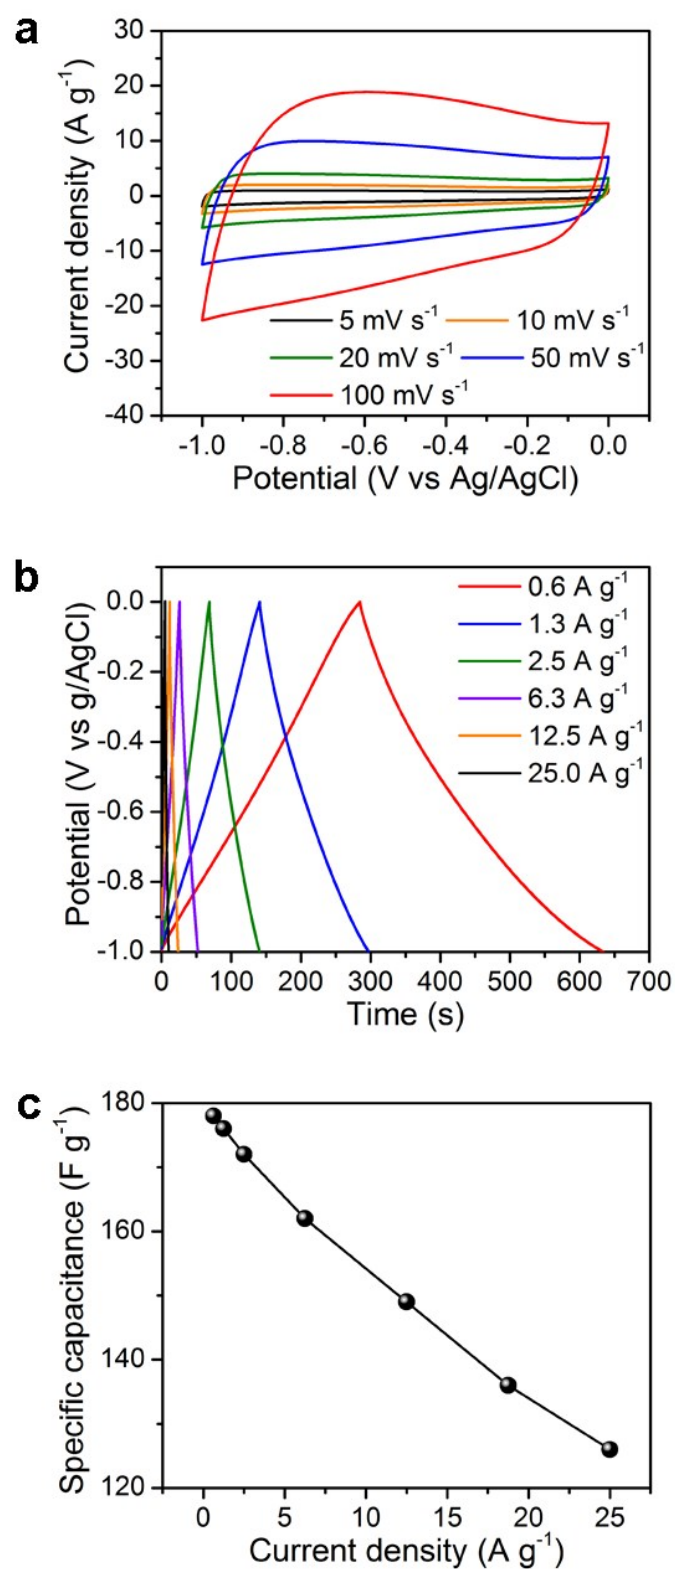

**Figure S11.** Electrochemical performance of AC electrode. **(a)** CV curves, **(b)** charge/discharge profiles and **(c)** specific capacitance of the AC electrode derived from discharge curves.

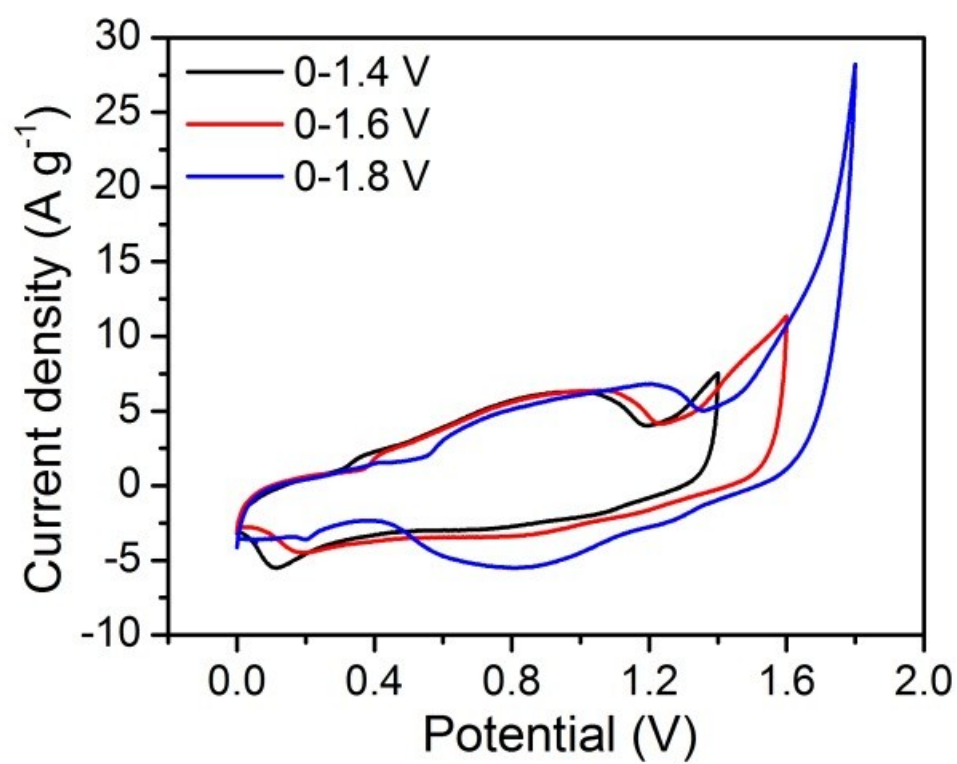

**Figure S12.** CV curves of ASC device at various potential windows at 20 mV s<sup>-1</sup>.

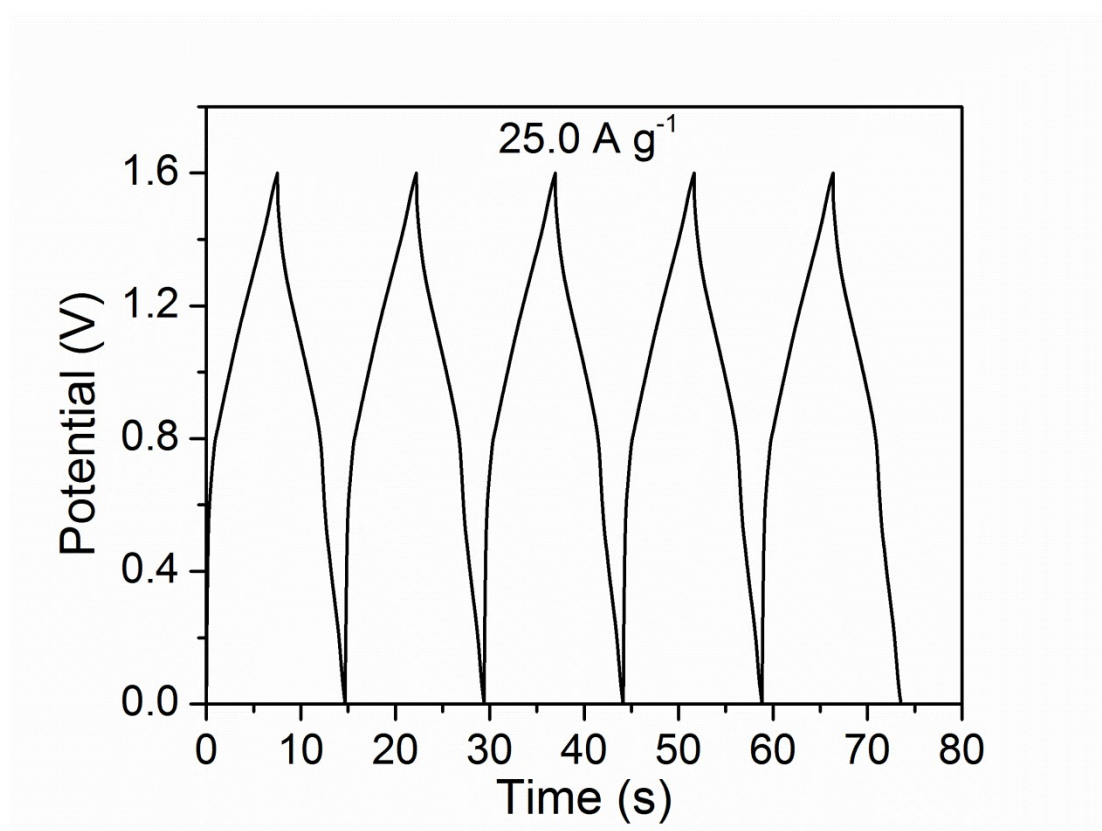

**Figure S13.** Charge-discharge curves of ASC device at a current density of  $25.0 \text{ A g}^{-1}$ .

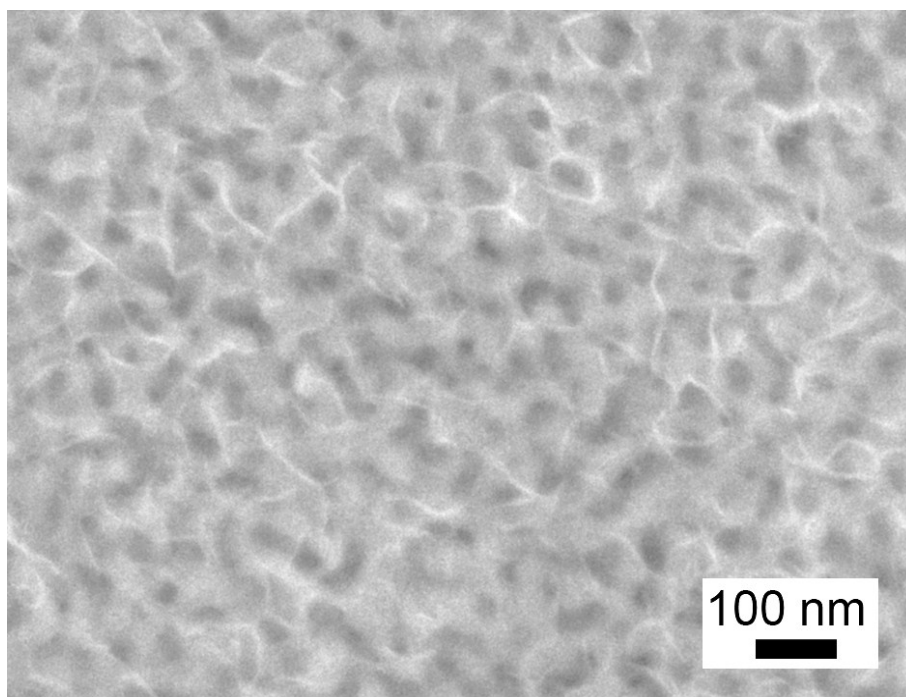

**Figure S14.** SEM image of NP Au/VA Ni(OH)<sub>2</sub> after the stability test of 10000 cycles.
